# Supplementary material for: Novel Wavelet Real Time Analysis of Neurovascular Coupling in Neonatal Encephalopathy
Source: Sci Rep. 2017 Apr 10;7:45958. doi: 10.1038/srep45958 (PMC5385531; doi:10.1038/srep45958)
Supplement: Supplementary Information [file srep45958-s1.pdf]

**Title** Novel Wavelet Real Time Analysis of Neurovascular Coupling in Neonatal Encephalopathy

Lina F Chalak, MD, MSCS; Fenghua Tian, Ph.D.; Beverly Huet MS, Diana Vasil RNC, Abbot Lptook, MD, Takashi Tarumi, Ph.D. and Rong Zhang, Ph.D.

**Supplement:**

## Detailed wavelet coherence analysis

Wavelet coherence is based on continuous wavelet transform of time series in the time-frequency domain by successively convolving the time series with the scaled and translated versions of a mother wavelet function  $\psi_0$ . The wavelet transform of a time series  $x(n)$  of length  $N$ , which is sampled from a continuous signal at a time step of  $\Delta t$ , is defined as:

$$W^X(n, s) = \sqrt{\frac{\Delta t}{s}} \sum_{n'=1}^N x(n) \psi_0^*[(n' - n)(\frac{\Delta t}{s})] \quad (1)$$

where  $n$  is the time index,  $s$  denotes the wavelet scale that is in inverse proportion to frequency, and  $*$  indicates the complex conjugate. The mother wavelet employed in this study is a Morlet wavelet (with  $\omega_0 = 6$ ), which provides a good trade-off to capture both the time and frequency characteristics of the observed  $S_{ct}O_2$  and aEEG signals. By using the Morlet wavelet, the relationship between the wavelet scale and its corresponding Fourier frequency ( $f_{wt}$ ) is  $f_{wt} = 0.97/s$ .

The cross-wavelet transform of two time series,  $x(n)$  and  $y(n)$ , is defined as:

$$W^{XY}(n, s) = W^X(n, s)W^{Y*}(n, s) \quad (2)$$

where the modulus  $|W^{XY}(n, s)|$  represents the joint power of  $x(n)$  and  $y(n)$ , and the complex argument  $\Delta\varphi(n, s) = \tan^{-1}\{\frac{Im[W^{XY}(n, s)]}{Re[W^{XY}(n, s)]}\}$  represents the relative phase between  $x(n)$  and  $y(n)$ .

In analogy to the magnitude-squared coherence (MSC) function based on Fourier transform (Zhang et al., 1998), a squared cross-wavelet coherence  $R^2(n, s)$  is defined as (Torrence and Webster, 1999):

$$(3)$$

where  $S$  is a smoothing operator in the time-frequency (scale) domain which uses a weighted running average in both the time and scale directions.  $R^2(n, s)$  ranges between 0 and 1 and can be conceptualized as a localized correlation coefficient between  $x(n)$  and  $y(n)$  in the time-frequency domain. To test the statistical significance of  $R^2(n, s)$  against noised background, a Monte Carlo method is implemented. Briefly, this method generates an ensemble of surrogate data pairs ( $n = 300$ ) that have the same model

coefficients as the real time series data based on a first-order autoregressive (AR1) model. Wavelet coherence is calculated for all of the surrogate data pairs. Then the significance level of  $R^2(n, s)$  of the observed time series is determined by comparing with those from the surrogate data at each time and wavelet scale. In this study a 95% confidence interval ( $p < 0.05$ ) is used for statistical testing.
